# Supplementary material
Source: PubMed Central journal article supplement (PMC4249170)
Supplement: AEM.01597-14_zam999105822so1.pdf [file AEM.01597-14_zam999105822so1.pdf]

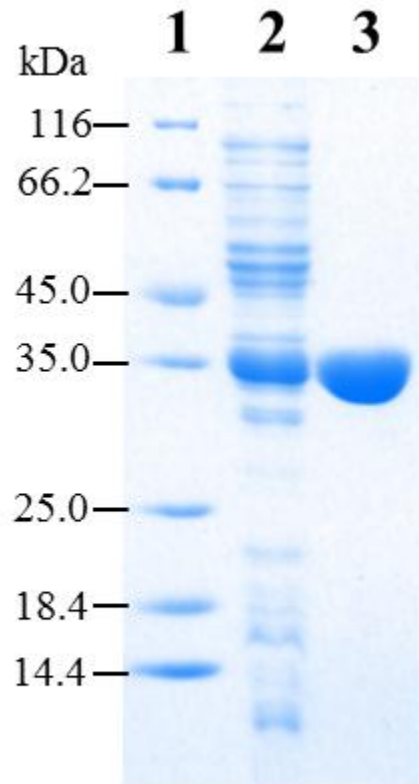

**FIG S1** SDS-PAGE analysis of the purified *RhEst1* from *Rhodococcus* sp. ECU1013 overexpressed in *E. coli* BL21 (DE3). Lane 1, protein markers. Lane 2, cell free extract. Lane 3, the purified enzyme.
